# Supplementary material for: Strain-controlled electronic and magnetic properties of tVS2/hVS2 van der Waals heterostructures
Source: Royal Society of Chemistry journal article supplement (doi:10.1039/d0cp05395c), 2021-01-01

# Strain controlled electronic and magnetic properties in $t\text{VS}_2/h\text{VS}_2$ van der Waals heterostructures

## Supporting Information

Dan Jin<sup>+</sup>,<sup>a</sup> Meimei Shi<sup>+</sup>,<sup>a</sup> Pan Li,<sup>b</sup> Huiyan Zhao,<sup>a</sup> Man Shen,<sup>a</sup> Fengxian Ma\*,<sup>b</sup>  
Zhixue Tian\*,<sup>b</sup> and Ying Liu<sup>a</sup>

<sup>a</sup> College of Physics, Hebei Advanced Thin Films Laboratory, Hebei Normal  
University, Shijiazhuang, 050024, China

<sup>b</sup> College of Physics, Hebei Key Laboratory of Photophysics Research and  
Application, Hebei Normal University, Shijiazhuang, 050024, China

[<sup>+</sup>] These authors contributed equally to this work.

\* To whom correspondence should be addressed.

Tel: 86-311-80787350

E-mail: [fengxianma@hebtu.edu.cn](mailto:fengxianma@hebtu.edu.cn)

E-mail: [zxtian@hebtu.edu.cn](mailto:zxtian@hebtu.edu.cn)

**Table S1. Total energies and the interface formation energies of these six possible configurations (without rotation) calculated using a  $20 \times 20 \times 1$  and a  $15 \times 15 \times 1$   $k$ -mesh, respectively. The red data were obtained from the  $15 \times 15 \times 1$   $k$ -mesh calculations. The total energies of the H-phase and the T-phase of the  $VS_2$  monolayers, and their bilayers calculated by PBE with (w-vdW) and without (wo-vdW) the vdW correction were also listed here. The interface formation energies were calculated based on Eq. (1) and Eq. (2).**

| Total energy (eV) |          | mono. wo-vdW |             | mono. w-vdW |             | bilayer w-vdW |             |
|-------------------|----------|--------------|-------------|-------------|-------------|---------------|-------------|
|                   |          | T: -19.7133  | H: -19.7527 | T: -20.1822 | H: -20.2016 | T: -40.5140   | H: -40.5468 |
| <i>top</i> -I     | -40.4795 | -0.169       |             | -0.016      |             | 0.0084        |             |
|                   | -40.4798 |              |             |             |             |               |             |
| <i>top</i> -II    | -40.4803 | -0.169       |             | -0.016      |             | 0.0084        |             |
|                   | -40.4806 |              |             |             |             |               |             |
| <i>hcp</i> -I     | -40.5253 | -0.177       |             | -0.024      |             | 0.0008        |             |
|                   | -40.5255 |              |             |             |             |               |             |
| <i>hcp</i> -II    | -40.5278 | -0.177       |             | -0.024      |             | 0.0004        |             |
|                   | -40.5280 |              |             |             |             |               |             |
| <i>fcc</i> -I     | -40.5370 | -0.179       |             | -0.026      |             | -0.0011       |             |
|                   | -40.5372 |              |             |             |             |               |             |
| <i>fcc</i> -II    | -40.5382 | -0.179       |             | -0.026      |             | -0.0013       |             |
|                   | -40.5385 |              |             |             |             |               |             |

**Fig. S1. (a) The density of states of the *fcc*-I heterostructure respect to the GGA + U method. (b) The band structure of the *fcc*-II configuration calculated by GGA + U. (c) The FM, NM, and AFM configurations of the *fcc*-II heterostructure. Here “E” represents the energy difference with respect to the FM state, which were obtained in the PBE calculations. (d) The spin densities of the *fcc*-II *t*VS<sub>2</sub>/*h*VS<sub>2</sub> heterostructure.**

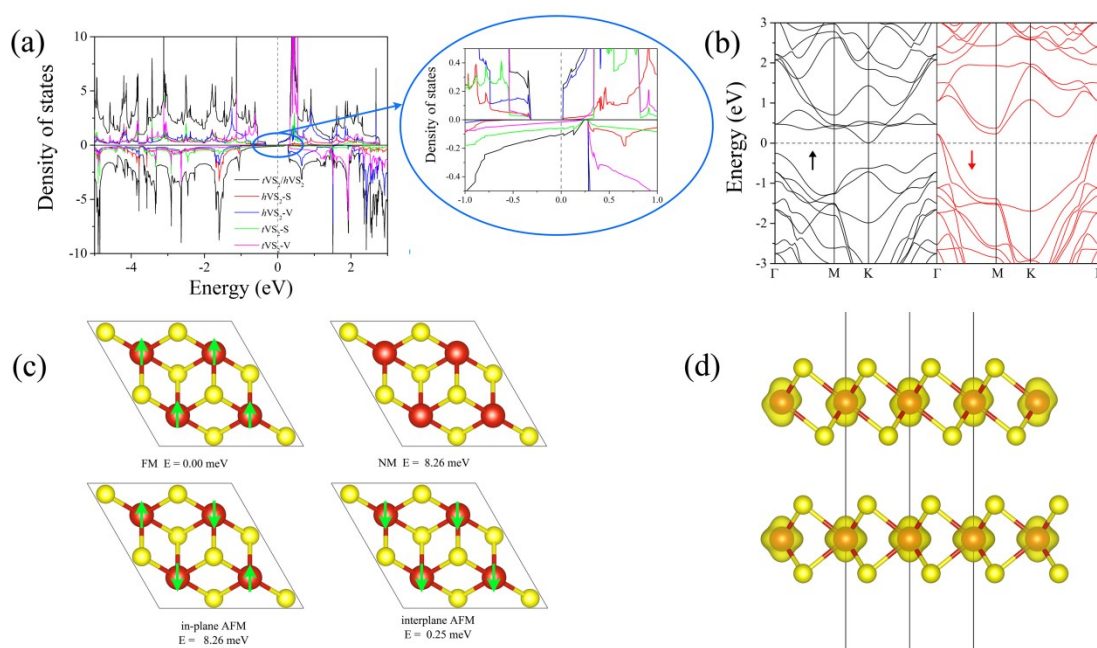

Fig. S2. (a) The FM, inter-AFM, and inplane-AFM states of the *fcc-I* configuration in a  $(4\times 4\times 1)$  supercell. “E” represents the energy difference with respect to the FM state. All energies were obtained in the PBE calculations. (b) and (c) are for the dependence of the energy per unit cell on the strain for the FM and AFM states of the  $tVS_2/hVS_2$  heterostructure with the *fcc-I* and *fcc-II* configurations, respectively.

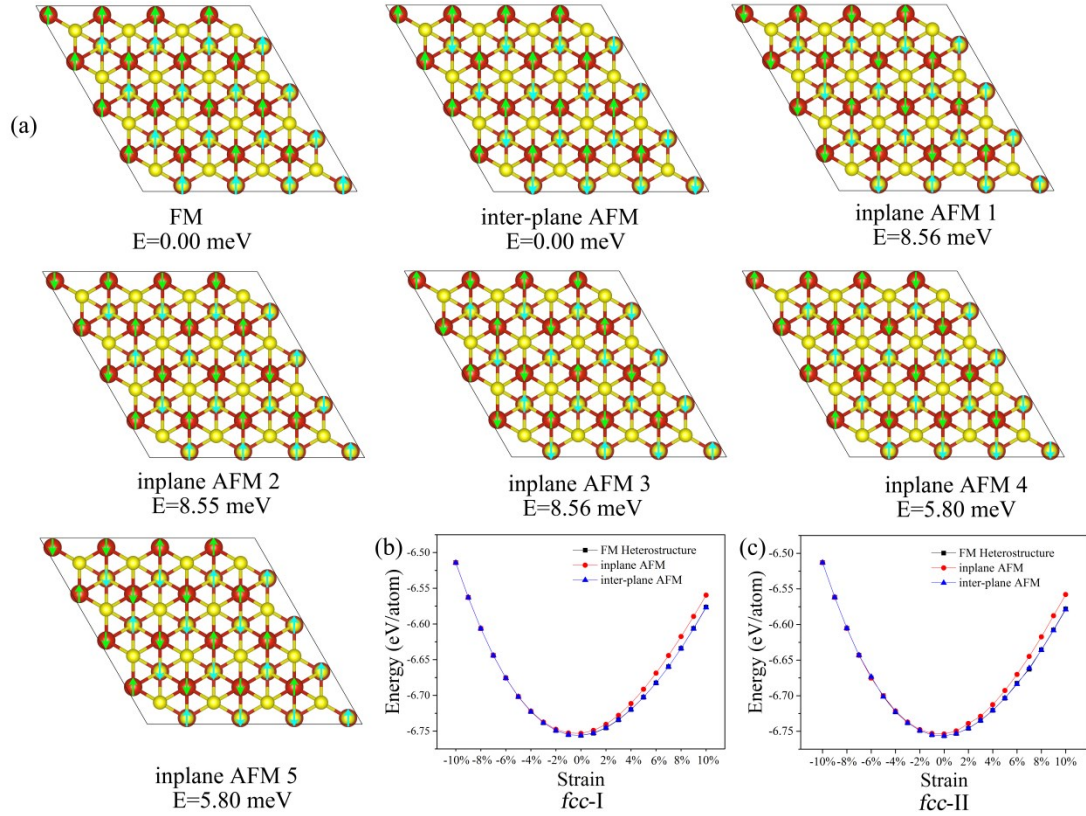

**Fig. S3. Orbital decomposed band structures of the FM  $t\text{VS}_2/h\text{VS}_2$  heterostructure calculated by GGA+U method. (a) and (b) are for the spin-up and spin-down states, respectively.**

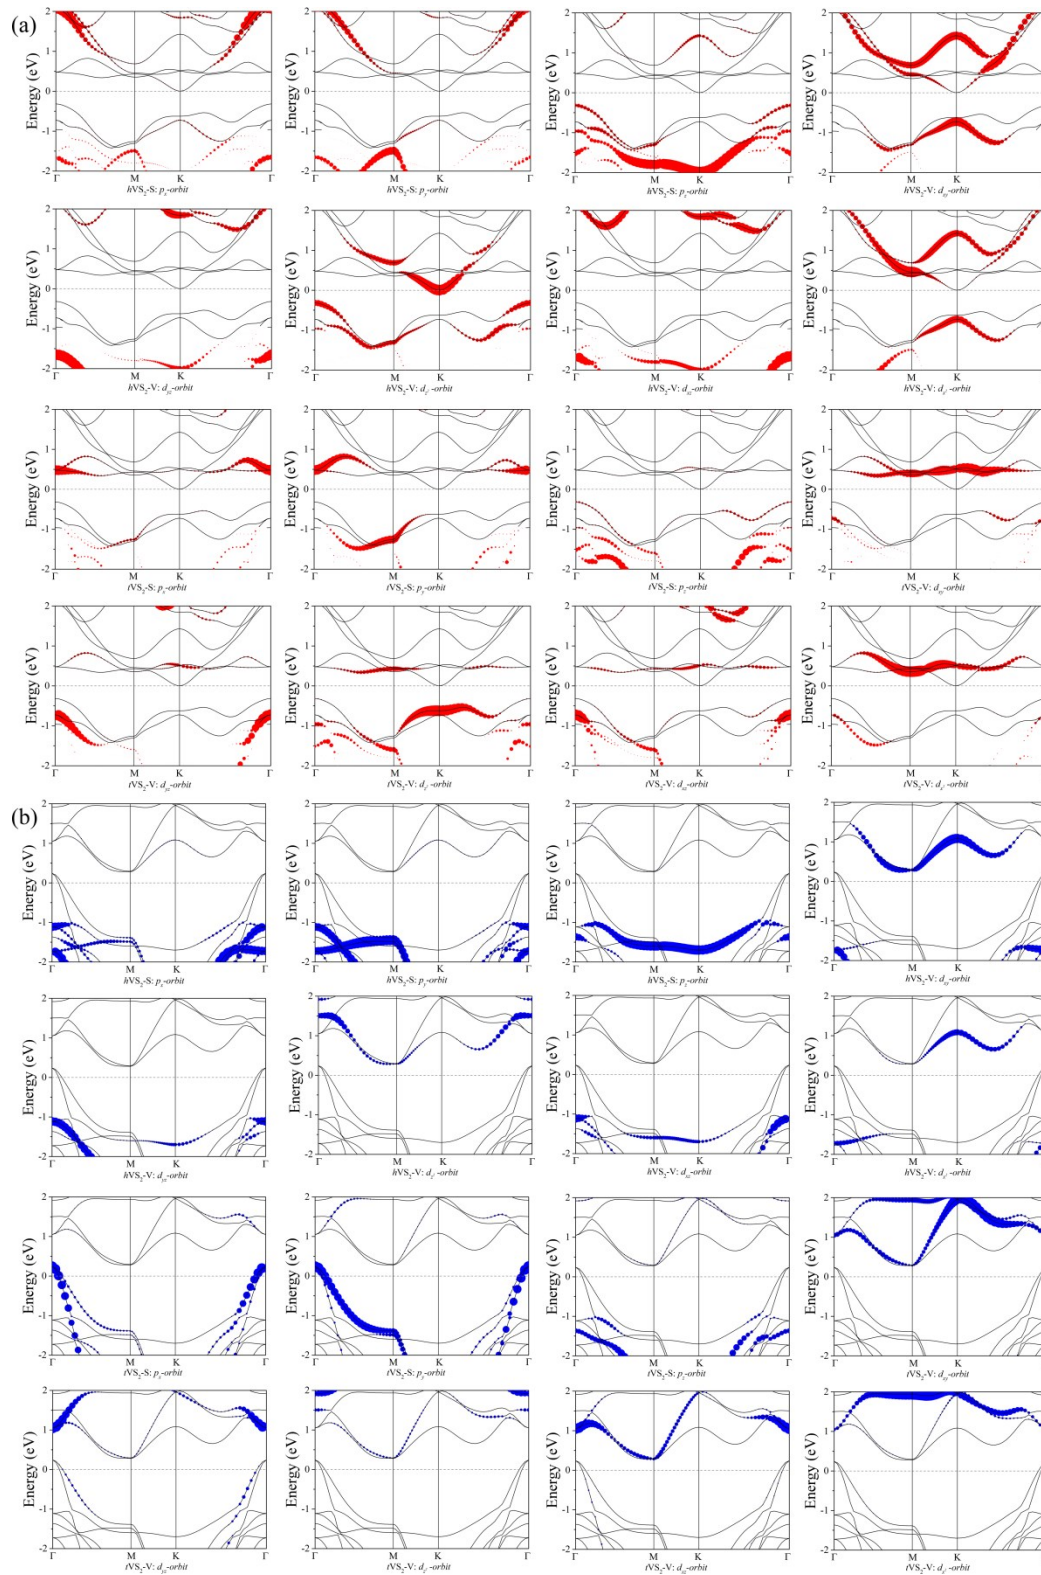

**Fig. S4. Electronic band structures of the AFM  $tVS_2/hVS_2$  heterostructures using different methods.**

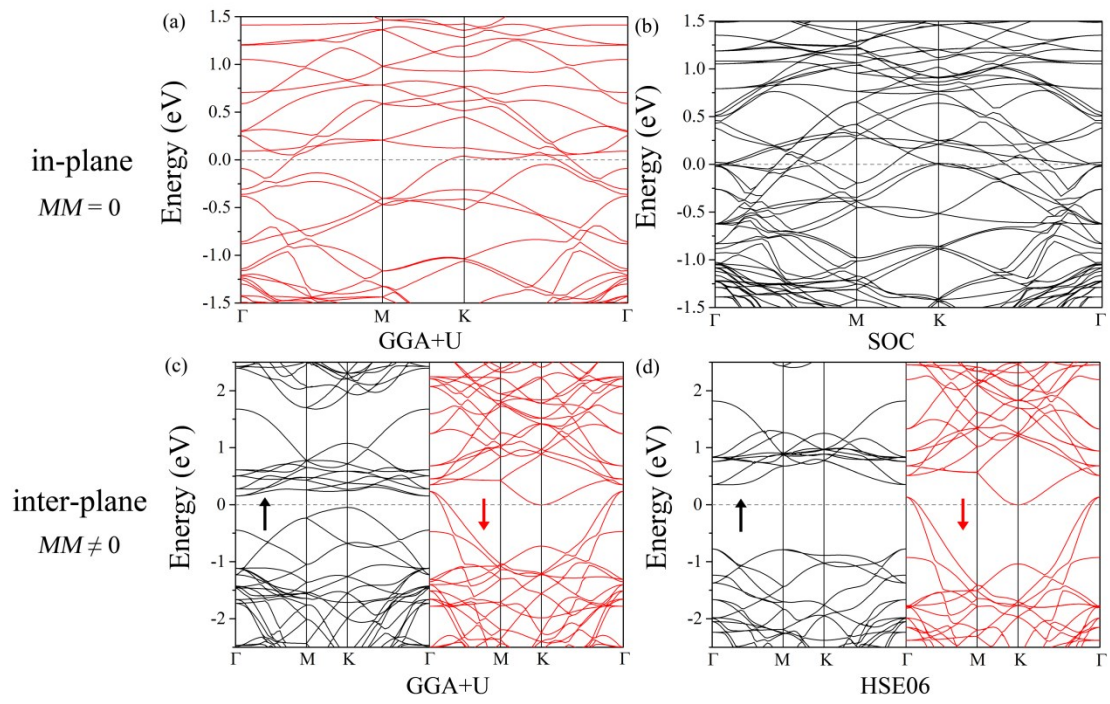



**Fig. S5. The band structures of the  $tVS_2/hVS_2$  heterostructures with biaxial (a) compressive strains from 1%~10% and (b) tensile strains from 1%~10%.**

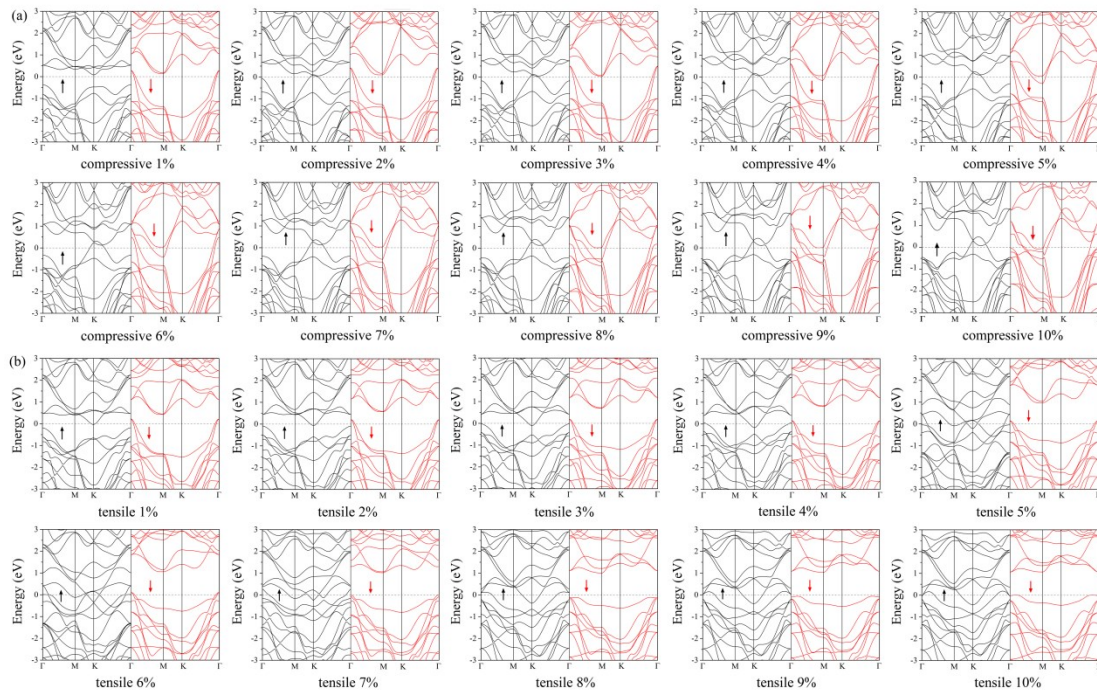

Fig. S6. Interlayer distance of  $t\text{VS}_2/h\text{VS}_2$  heterostructure with different strains.

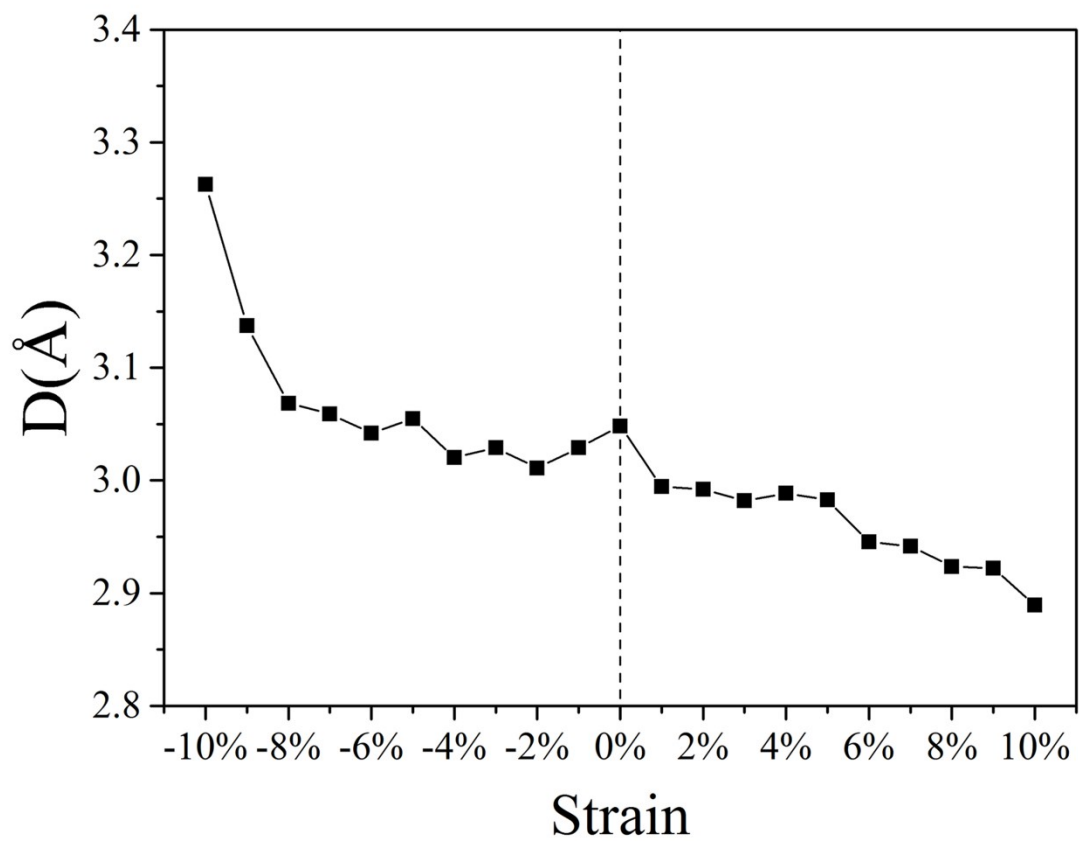



**Fig. S7. Orbital decomposed band structures of  $tVS_2/hVS_2$  heterostructure with a tensile strain of 5%, (a) and (b) are for the spin-up and spin-down states, respectively.**

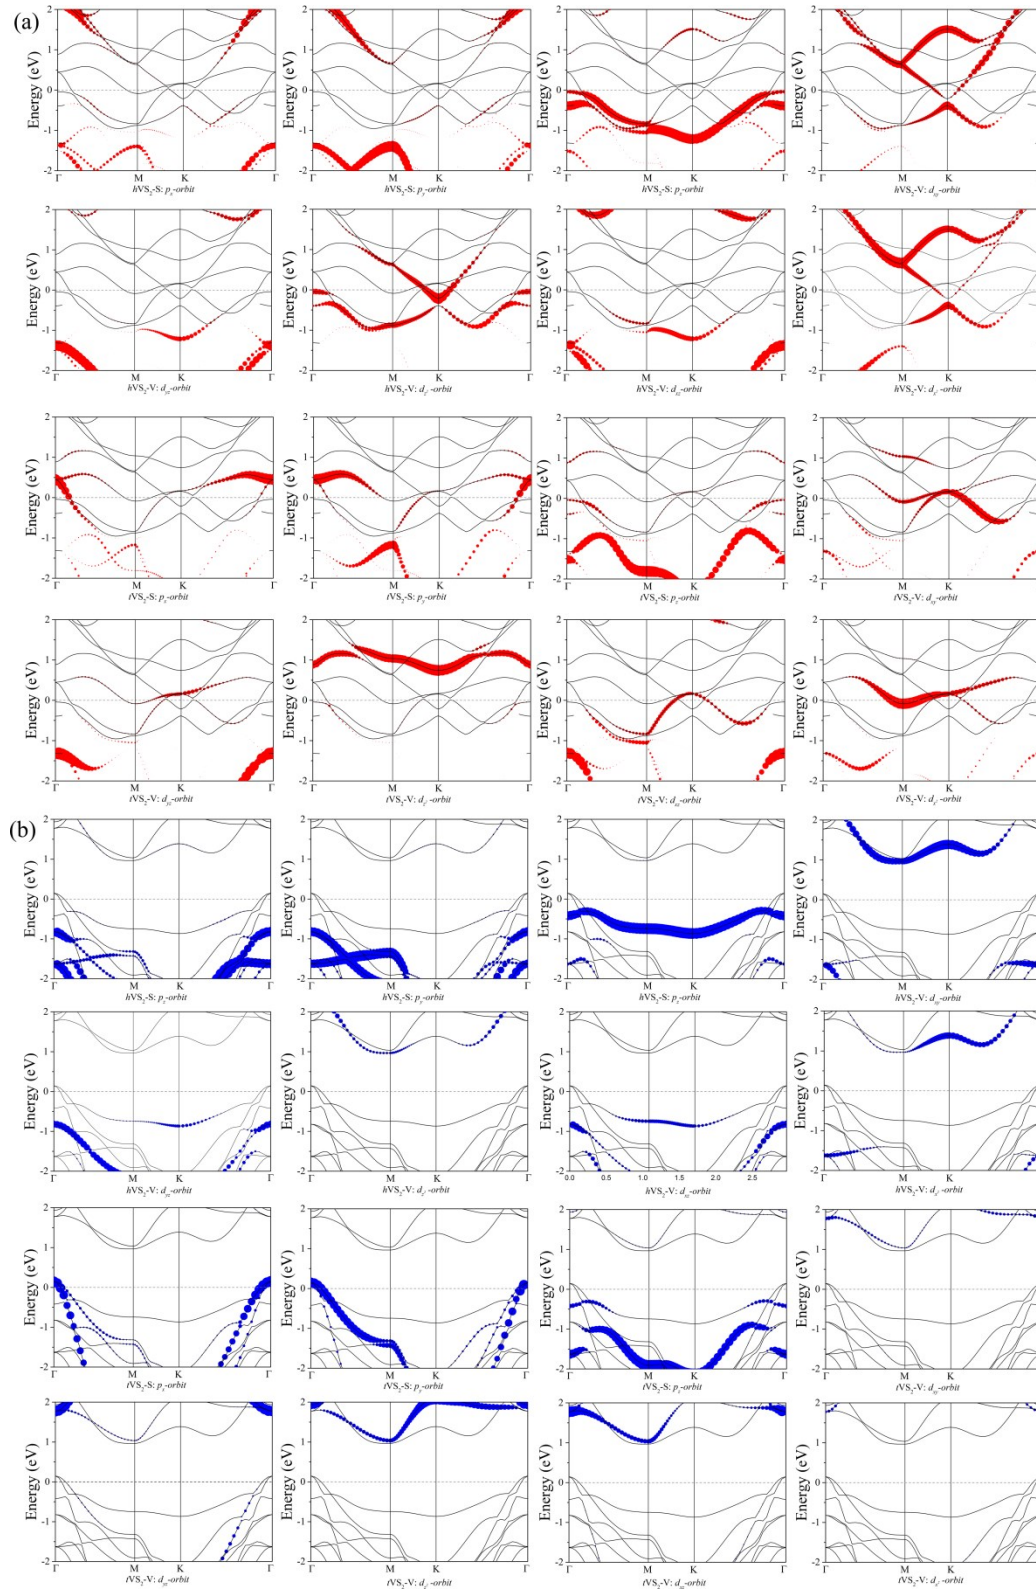

Supplement: d0cp05395c1.pdf [file d0cp05395c1.pdf]
